# Supplementary material for: Assessment of the quality and content of clinical practice guidelines (CPGs) for vitamin D and for immigrants using the AGREE-II instrument: a protocol for systematic review
Source: PubMed Central journal article supplement (PMC9673290; doi:10.1186/s13643-022-02129-6), 2022-11-17
Supplement: 13643_2022_2129_MOESM3_ESM.pdf [file 13643_2022_2129_MOESM3_ESM.pdf]

## Additional file 2 AGREE II Score Sheet

| Domain                       | Item                                                                                                          | AGREE II Rating                     |                         |   |   |   |    |                                      |
|------------------------------|---------------------------------------------------------------------------------------------------------------|-------------------------------------|-------------------------|---|---|---|----|--------------------------------------|
|                              |                                                                                                               | 1<br><i>Strongly Disagree</i>       | 2                       | 3 | 4 | 5 | 6  | 7<br><i>Strongly Agree</i>           |
| Scope and purpose            | 1. The overall objective(s) of the guideline is (are) specifically described.                                 |                                     |                         |   |   |   |    |                                      |
|                              | 2. The health question(s) covered by the guideline is (are) specifically described.                           |                                     |                         |   |   |   |    |                                      |
|                              | 3. The population (patients, public, etc.) to whom the guideline is meant to apply is specifically described. |                                     |                         |   |   |   |    |                                      |
| Stakeholder involvement      | 4. The guideline development group includes individuals from all the relevant professional groups.            |                                     |                         |   |   |   |    |                                      |
|                              | 5. The views and preferences of the target population (patients, public, etc.) have been sought.              |                                     |                         |   |   |   |    |                                      |
|                              | 6. The target users of the guideline are clearly defined.                                                     |                                     |                         |   |   |   |    |                                      |
| Rigor of development         | 7. Systematic methods were used to search for evidence.                                                       |                                     |                         |   |   |   |    |                                      |
|                              | 8. The criteria for selecting the evidence are clearly described.                                             |                                     |                         |   |   |   |    |                                      |
|                              | 9. The strengths and limitations of the body of evidence are clearly described.                               |                                     |                         |   |   |   |    |                                      |
|                              | 10. The methods for formulating the recommendations are clearly described.                                    |                                     |                         |   |   |   |    |                                      |
|                              | 11. The health benefits, side effects and risks have been considered in formulating the recommendations.      |                                     |                         |   |   |   |    |                                      |
|                              | 12. There is an explicit link between the recommendations and the supporting evidence.                        |                                     |                         |   |   |   |    |                                      |
|                              | 13. The guideline has been externally reviewed by experts prior to its publication.                           |                                     |                         |   |   |   |    |                                      |
|                              | 14. A procedure for updating the guideline is provided.                                                       |                                     |                         |   |   |   |    |                                      |
| Clarity of presentation      | 15. The recommendations are specific and unambiguous.                                                         |                                     |                         |   |   |   |    |                                      |
|                              | 16. The different options for management of the condition or health issue are clearly presented.              |                                     |                         |   |   |   |    |                                      |
|                              | 17. Key recommendations are easily identifiable.                                                              |                                     |                         |   |   |   |    |                                      |
| Applicability                | 18. The guideline describes facilitators and barriers to its application.                                     |                                     |                         |   |   |   |    |                                      |
|                              | 19. The guideline provides advice and/or tools on how the recommendations can be put into practice.           |                                     |                         |   |   |   |    |                                      |
|                              | 20. The potential resource implications of applying the recommendations have been considered.                 |                                     |                         |   |   |   |    |                                      |
|                              | 21. The guideline presents monitoring and/ or auditing criteria.                                              |                                     |                         |   |   |   |    |                                      |
| Editorial independence       | 22. The views of the funding body have not influenced the content of the guideline.                           |                                     |                         |   |   |   |    |                                      |
|                              | 23. Competing interests of guideline development group members have been recorded and addressed.              |                                     |                         |   |   |   |    |                                      |
| Overall Guideline Assessment | 1. Rate the overall quality of this guideline.                                                                | 1<br><i>Lowest possible quality</i> | 2                       | 3 | 4 | 5 | 6  | 7<br><i>Highest possible quality</i> |
| Overall Guideline Assessment | 2. I would recommend this guideline for use.                                                                  | Yes                                 | Yes, with modifications |   |   |   | No |                                      |
|                              |                                                                                                               |                                     |                         |   |   |   |    |                                      |
